# Supplementary material for: C-Reactive Protein and Lymphocyte-to-Monocyte Ratio Predict Recurrence in Stage III Melanoma Patients with Microscopic Sentinel Lymph Node Metastasis
Source: MDPI journal article supplement (doi:10.3390/cancers15030702), 2023-01-23
Supplement: s1 [file s1]

# C-Reactive Protein and Lymphocyte-to-Monocyte Ratio Predict Recurrence in Stage III Melanoma Patients with Microscopic Sentinel Lymph Node Metastasis

**Table S1a:** Baseline tumor characteristics (primary; n=138).

|                                           | All patients<br>n=138 (100%) |
|-------------------------------------------|------------------------------|
| <b>Site of primary</b>                    |                              |
| Head and neck                             | 4 (2.9)                      |
| Trunk                                     | 51 (37.0)                    |
| Upper extremity                           | 20 (14.5)                    |
| Lower extremity                           | 63 (45.7)                    |
| <b>Type of primary</b>                    |                              |
| SSM                                       | 39 (28.3)                    |
| NMM                                       | 63 (45.7)                    |
| ALM                                       | 6 (4.3)                      |
| LMM                                       | 0 (0.0)                      |
| other                                     | 24 (17.4)                    |
| unknown                                   | 6 (4.3)                      |
| <b>Tumor thickness (Breslow)</b>          |                              |
| <1mm                                      | 3 (2.2)                      |
| ≥1<2mm                                    | 36 (26.1)                    |
| ≥2<4mm                                    | 53 (38.4)                    |
| ≥4mm                                      | 46 (33.3)                    |
| Median in mm (IQR)*                       | 3.1 (1.6–4.5)                |
| <b>Presence of ulceration</b>             |                              |
| No                                        | 74 (53.6)                    |
| Yes                                       | 64 (46.4)                    |
| <b>Mitosis rate &gt; 1/mm<sup>2</sup></b> |                              |
| No                                        | 5 (3.6)                      |
| Yes                                       | 95 (68.8)                    |
| Unknown                                   | 38 (27.5)                    |
| *IQR = Interquartile range (Q1 – Q3).     |                              |

**Table S1b:** Baseline tumor characteristics (lymph; node metastasis; n=138).

|                                                   | <b>All patients</b><br>n=138 (100%) |
|---------------------------------------------------|-------------------------------------|
| <b>Average resected number of SLN</b>             |                                     |
| 1                                                 | 69 (50.0)                           |
| 2                                                 | 38 (27.5)                           |
| 3                                                 | 15 (10.9)                           |
| ≥4                                                | 16 (11.5)                           |
| <b>Number of affected SLN</b>                     |                                     |
| 1                                                 | 108 (78.3)                          |
| 2                                                 | 22 (15.9)                           |
| 3                                                 | 8 (5.8)                             |
| <b>Largest diameter of SLN metastasis (in mm)</b> |                                     |
| <1 (0.09-0.99)                                    |                                     |
| ≥1 <2 (1.00-1.99)                                 | 41 (29.7)                           |
| ≥2 <3 (2.00-2.99)                                 | 28 (20.3)                           |
| ≥3 <4 (3.00-3.99)                                 | 19 (13.8)                           |
| ≥4                                                | 14 (10.1)                           |
| Unknown                                           | 26 (18.8)                           |
| Median in mm (IQR)*                               | 10 (7.2)<br>1.3 (0.5-3.0)           |
| <b>Capsule invasion of SLN metastasis</b>         |                                     |
| No                                                | 122 (88.4)                          |
| Yes                                               | 15 (10.9)                           |
| Unknown                                           | 1 (0.7)                             |
| <b>Presence of satellite metastasis</b>           |                                     |
| No                                                | 130 (94.2)                          |
| Yes                                               | 8 (5.8)                             |
| <b>CLND</b>                                       |                                     |
| No                                                | 66 (47.8)                           |
| Yes                                               | 72 (52.2)                           |
| -no additional metastasis in CLND                 | 58 (61.7)                           |
| -additional metastasis in CLND                    | 36 (38.3)                           |
| *IQR = Interquartile range (Q1 – Q3).             |                                     |



4) High pairwise Pearson correlation ( $r \geq 0.7$ ) between blood values. In this case, the weaker parameter regarding exclusion criteria 1-3 was dropped.

\* Note: Single blood value in multivariate Cox regression analysis with following co-variables: Age, AJCC-stage, capsule invasion, adjuvant interferon- $\alpha$ , size of biggest SLN metastasis.

\*\* High correlation with NLR.

\*\*\* High correlation with LMR.

Note: Significant results are **bold**.

**Table S2b:** Overview of results of all blood variables in univariate and multivariate Cox regression analysis for overall survival (OS) with applied exclusion criteria.

| Blood values<br>(continuous<br>parameter) | Univariate Cox regression<br>analysis |                                 |         | Multivariate Cox regression<br>analysis* |                                                      |         | <u>Exclusion<br/>criteria</u> |
|-------------------------------------------|---------------------------------------|---------------------------------|---------|------------------------------------------|------------------------------------------------------|---------|-------------------------------|
|                                           | n                                     | HR (95% CI)                     | p-value | n                                        | HR (95% CI)                                          | p-value |                               |
| NLR                                       | 124                                   | 1.174<br>(0.967-1.426)<br>0.105 |         | 114                                      | <b>1.396</b><br><b>(1.004-1.941)</b><br><b>0.047</b> |         | 4)**                          |
| dNLR                                      | 124                                   | 1.287<br>(0.945-1.753)<br>0.109 |         | 114                                      | <b>1.410</b><br><b>(1.024-1.942)</b><br><b>0.035</b> |         | Not excluded                  |
| LMR                                       | 124                                   | 0.818<br>(0.642-1.042)<br>0.103 |         | 114                                      | 0.769<br>(0.504-1.256)<br>0.326                      |         | 1)                            |
| PLR                                       | 125                                   | 1.003<br>(0.998-1.007)<br>0.306 |         | 114                                      | 1.148<br>(0.804-1.639)<br>0.446                      |         | 1)                            |
| Platelet count                            | 136                                   | 1.000<br>(0.997-1.003)<br>0.977 |         | 126                                      | 1.103<br>(0.818-1.488)<br>0.518                      |         | 1)                            |
| Absolute leucocyte<br>count               | 136                                   | 1.044(0.943-1.155)<br>0.407     |         | 126                                      | <b>1.334</b><br><b>(1.022-1.742)</b><br><b>0.034</b> |         | Not excluded                  |
| Absolute lymphocyte<br>count              | 124                                   | 0.777<br>(0.482-1.251)<br>0.299 |         | 114                                      | 0.935<br>(0.639-1.370)<br>0.732                      |         | 1)                            |
| Relative lymphocyte<br>count              | 124                                   | 0.966<br>(0.926-1.008)<br>0.109 |         | 114                                      | 0.710<br>(0.492-1.023)<br>0.066                      |         | 1)                            |
| Absolute neutrophile<br>count             | 124                                   | 1.081<br>(0.975-1.200)<br>0.140 |         | 114                                      | <b>1.404</b><br><b>(1.086-1.815)</b><br><b>0.010</b> |         | Not excluded                  |
| Relative neutrophile<br>count             | 123                                   | 1.027<br>(0.987-1.068)<br>0.187 |         | 113                                      | 1.399<br>(0.951-2.057)<br>0.088                      |         | 1)                            |
| Absolute eosinophile<br>count             | 123                                   | 0.060<br>(0.002-1.757)<br>0.103 |         | 113                                      | 9.864<br>(0.564-1.323)<br>0.500                      |         | 1)                            |
| Relative eosinophile<br>count             | 123                                   | 0.745<br>(0.548-1.012)<br>0.059 |         | 113                                      | 0.764<br>(0.501-1.165)<br>0.211                      |         | 1)                            |
| Absolute monocyte<br>count                | 124                                   | 1.538<br>(0.358-6.620)<br>0.563 |         | 114                                      | 1.125<br>(0.808-1.569)<br>0.485                      |         | 1)                            |

|                         |     |                                  |                      |     |                              |                       |    |
|-------------------------|-----|----------------------------------|----------------------|-----|------------------------------|-----------------------|----|
| Relative monocyte count | 124 | 1.050<br>0.486                   | (0.915-1.206)        | 114 | 0.939<br>0.704               | (0.679-1.299)         | 1) |
| LDH                     | 51  | <b>1.027</b><br><b>&lt;0.001</b> | <b>(1.014-1.041)</b> | 48  | <b>4.877</b><br><b>0.007</b> | <b>(1.550-15.342)</b> | 2) |
| CRP                     | 136 | 1.019<br>0.548                   | (0.958-1.084)        | 126 | 1.216<br>0.157               | (0.928-1.594)         | 1) |

**Exclusion criteria:**

- Not significant in univariate or multivariate Cox regression analysis.
- Patient number n<100.
- Relative blood values, if there are absolute values provided.
- High pairwise Pearson correlation ( $r \geq 0.7$ ) between blood values. In this case, the weaker parameter regarding exclusion criteria 1-3 was dropped.

\* Note: Single blood value in multivariate Cox regression analysis with following co-variables: Age, AJCC-stage, capsule invasion, adjuvant interferon- $\alpha$ , size of biggest SLN metastasis.

\*\* High correlation with dNLR.

Note: Significant results are **bold**.

**Table S3.** Univariate Cox regression analysis with covariates for recurrence-free survival and overall survival.

| Variable<br><br>(Reference bold)                                                      | Univariate Cox analysis                           |                                       |              |                                                   |                                           |                  |
|---------------------------------------------------------------------------------------|---------------------------------------------------|---------------------------------------|--------------|---------------------------------------------------|-------------------------------------------|------------------|
|                                                                                       | Recurrence-free survival                          |                                       |              | Overall survival                                  |                                           |                  |
|                                                                                       | HR                                                | (95% CI)                              | p-value      | HR                                                | (95% CI)                                  | p-value          |
| Age<br>(n=55; n=83)<br>>65 years vs ≤65 years                                         | <b>1.985</b>                                      | <b>(1.261-3.125)</b>                  | <b>0.003</b> | <b>3.060</b>                                      | <b>(1.657-5.650)</b>                      | <b>&lt;0.001</b> |
| AJCC-stage<br>(n=36, n=32, n=70, n=0)<br>IIIB vs IIIA<br>IIIC vs IIIA<br>IIID vs IIIA | 2.247<br>0.052<br><b>4.303 (2.114-8.759)</b><br>/ | (0.992-5.087)<br><br><b>&lt;0.001</b> |              | 1.656<br>0.339<br><b>2.685 (1.111-6.490)</b><br>/ | (0.589-4.658)<br><br><b>(1.111-6.490)</b> |                  |
| Capsule invasion<br>(n=15; n=122)<br>yes vs no                                        | 1.677 (0.858-3.277)                               | 0.130                                 |              | <b>4.394</b><br><b>&lt;0.001</b>                  | <b>(2.120-9.109)</b>                      |                  |
| Adjuvant interferon- $\alpha$                                                         |                                                   |                                       |              |                                                   |                                           |                  |

|                                                                                |                                  |                                |                                  |                                |
|--------------------------------------------------------------------------------|----------------------------------|--------------------------------|----------------------------------|--------------------------------|
| (n=45; n=92)<br>yes vs <b>no</b>                                               | 0.692<br>0.143                   | (0.422-1.133)                  | <b>0.329</b><br><b>0.003</b>     | <b>(0.156-0.692)</b>           |
| Size of biggest SLN metastasis<br>(n=66; n=62)<br>> 1mm vs ≤ <b>1mm</b>        | <b>1.849</b><br><b>0.013</b>     | <b>(1.139-3.004)</b>           | <b>3.444</b><br><b>&lt;0.001</b> | <b>(1.674-7.086)</b>           |
| Gender<br>(n=67; n=71)<br>female vs <b>male</b>                                | 0.721<br>0.158                   | (0.458-1.136)                  | 0.672<br>0.203                   | (0.364-1.239)                  |
| Ulceration<br>(n=64; n=74)<br>yes vs <b>no</b>                                 | <b>2.390</b><br><b>0.001</b>     | <b>(1.505-3.794)</b>           | <b>2.044</b><br><b>0.022</b>     | <b>(1.108-3.770)</b>           |
| Mitotic rate<br>(n=95; n=5)<br>>1/mm <sup>2</sup> vs ≤ <b>1/mm<sup>2</sup></b> | 0.260<br>0.182                   | (0.036-1.881)                  | 0.045<br>0.403                   | (0.000-64.245)                 |
| Number of affected SLN<br>(n=108; n=22; n=8)<br>2 vs <b>1</b><br>3 vs <b>1</b> | 0.784<br>0.477<br>1.921<br>0.104 | (0.401-1.534)<br>(0.873-4.227) | 0.493<br>0.179<br>0.621<br>0.512 | (0.175-1.385)<br>(0.149-2.579) |
| Satellite metastases<br>(n=8; n=130)<br>yes vs <b>no</b>                       | 0.683<br>0.459                   | (0.249-1.873)                  | 0.968<br>0.956                   | (0.298-3.138)                  |
| CLND<br>(n=72; n=66)<br>yes vs <b>no</b>                                       | <b>1.710</b><br><b>0.024</b>     | <b>(1.072-2.729)</b>           | 1.356<br>0.337                   | (0.728-2.525)                  |
| Note: Significant results are <b>bold</b> .                                    |                                  |                                |                                  |                                |

**Table S4.** Univariate and multivariate Cox regression analysis with multiple blood value cut-offs of NLR, LMR and CRP for recurrence-free survival.

| Blood value combinations                                                                                                                                                         |                             |                  |                                      |                             |                  |
|----------------------------------------------------------------------------------------------------------------------------------------------------------------------------------|-----------------------------|------------------|--------------------------------------|-----------------------------|------------------|
| Univariate Cox analysis                                                                                                                                                          |                             |                  | Multivariate Cox analysis *          |                             |                  |
| Event number                                                                                                                                                                     | HR (95% CI)                 |                  | Event number                         | HR (95% CI)                 |                  |
| p-value                                                                                                                                                                          |                             |                  | p-value                              |                             |                  |
| NLR (≥3.5) + CRP (>3.0)                                                                                                                                                          |                             |                  | NLR (≥3.5) + CRP (>3.0)              |                             |                  |
| 1 (n=45) vs 0 (n=71) events                                                                                                                                                      | <b>2.673 (1.616-4.421)</b>  | <b>&lt;0.001</b> | 1 (n=39) vs 0 (n=67) events          | <b>2.370 (1.352-4.156)</b>  | <b>0.003</b>     |
| 2 (n=9) vs 0 (n=71) events                                                                                                                                                       | <b>4.131 (1.872-9.117)</b>  | <b>&lt;0.001</b> | 2 (n=8) vs 0 (n=67) events           | <b>4.838 (2.009-11.652)</b> | <b>&lt;0.001</b> |
| 1 (n=45) vs 2 (n=9) events                                                                                                                                                       | 0.647 (0.298-1.402)         | 0.270            | 1 (n=39) vs 2 (n=8) events           | 0.490 (0.200-1.203)         | 0.119            |
| LMR (<3.5) + CRP (>3.0)                                                                                                                                                          |                             |                  | LMR (<3.5) + CRP (>3.0)              |                             |                  |
| 1 (n=57) vs 0 (n=51) events                                                                                                                                                      | <b>3.365 (1.870-6.054)</b>  | <b>&lt;0.001</b> | 1 (n=53) vs 0 (n=48) events          | <b>3.239 (1.710-6.135)</b>  | <b>&lt;0.001</b> |
| 2 (n=17) vs 0 (n=51) events                                                                                                                                                      | <b>6.386 (3.119-13.076)</b> | <b>&lt;0.001</b> | 2 (n=13) vs 0 (n=48) events          | <b>7.700 (3.436-17.255)</b> | <b>&lt;0.001</b> |
| 1 (n=57) vs 2 (n=17) events                                                                                                                                                      | <b>0.527 (0.289-0.960)</b>  | <b>0.036</b>     | 1 (n=53) vs 2 (n=13) events          | <b>0.421 (0.212-0.835)</b>  | <b>0.013</b>     |
| NLR (≥3.5) + LMR (<3.5)                                                                                                                                                          |                             |                  | NLR (≥3.5) + LMR (<3.5)              |                             |                  |
| 1 (n=36) vs 0 (n=63) events                                                                                                                                                      | <b>2.133 (1.217-3.738)</b>  | <b>0.008</b>     | 1 (n=32) vs 0 (n=59) events          | <b>2.216 (1.211-4.055)</b>  | <b>0.010</b>     |
| 2 (n=26) vs 0 (n=63) events                                                                                                                                                      | <b>2.614 (1.463-4.671)</b>  | <b>0.001</b>     | 2 (n=23) vs 0 (n=59) events          | <b>2.160 (1.113-4.189)</b>  | <b>0.023</b>     |
| 1 (n=36) vs 2 (n=26) events                                                                                                                                                      | 0.816 (0.448-1.488)         | 0.507            | 1 (n=32) vs 2 (n=23) events          | 1.026 (0.521-2.020)         | 0.941            |
| NLR (≥3.5) + LMR (<3.5) + CRP (>3.0)                                                                                                                                             |                             |                  | NLR (≥3.5) + LMR (<3.5) + CRP (>3.0) |                             |                  |
| 1 (n=41) vs 0 (n=48) events                                                                                                                                                      | <b>3.054 (1.612-5.788)</b>  | <b>&lt;0.001</b> | 1 (n=39) vs 0 (n=45) events          | <b>3.398 (1.709-6.755)</b>  | <b>&lt;0.001</b> |
| 2 (n=28) vs 0 (n=48) events                                                                                                                                                      | <b>4.167 (2.148-8.083)</b>  | <b>&lt;0.001</b> | 2 (n=23) vs 0 (n=45) events          | <b>3.515 (1.647-7.500)</b>  | <b>0.001</b>     |
| 3 (n=8) vs 0 (n=48) events                                                                                                                                                       | <b>6.059 (2.456-14.945)</b> | <b>&lt;0.001</b> | 3 (n=7) vs 0 (n=45) events           | <b>7.690 (2.789-21.202)</b> | <b>&lt;0.001</b> |
| 1 (n=41) vs 3 (n=8) events                                                                                                                                                       | 0.504 (0.218-1.165)         | 0.109            | 1 (n=39) vs 3 (n=7) events           | 0.442 (0.173-1.128)         | 0.087            |
| 2 (n=28) vs 3 (n=8) events                                                                                                                                                       | 0.688 (0.293-1.617)         | 0.391            | 2 (n=23) vs 3 (n=7) events           | 0.457 (0.167-1.251)         | 0.128            |
| *Single blood value in multivariate Cox regression analysis with following covariates: Age, AJCC-stage, capsule invasion, adjuvant Interferon-α, size of biggest SLN metastasis. |                             |                  |                                      |                             |                  |
| Note: Significant results are <b>bold</b> .                                                                                                                                      |                             |                  |                                      |                             |                  |

## Supplementary figure

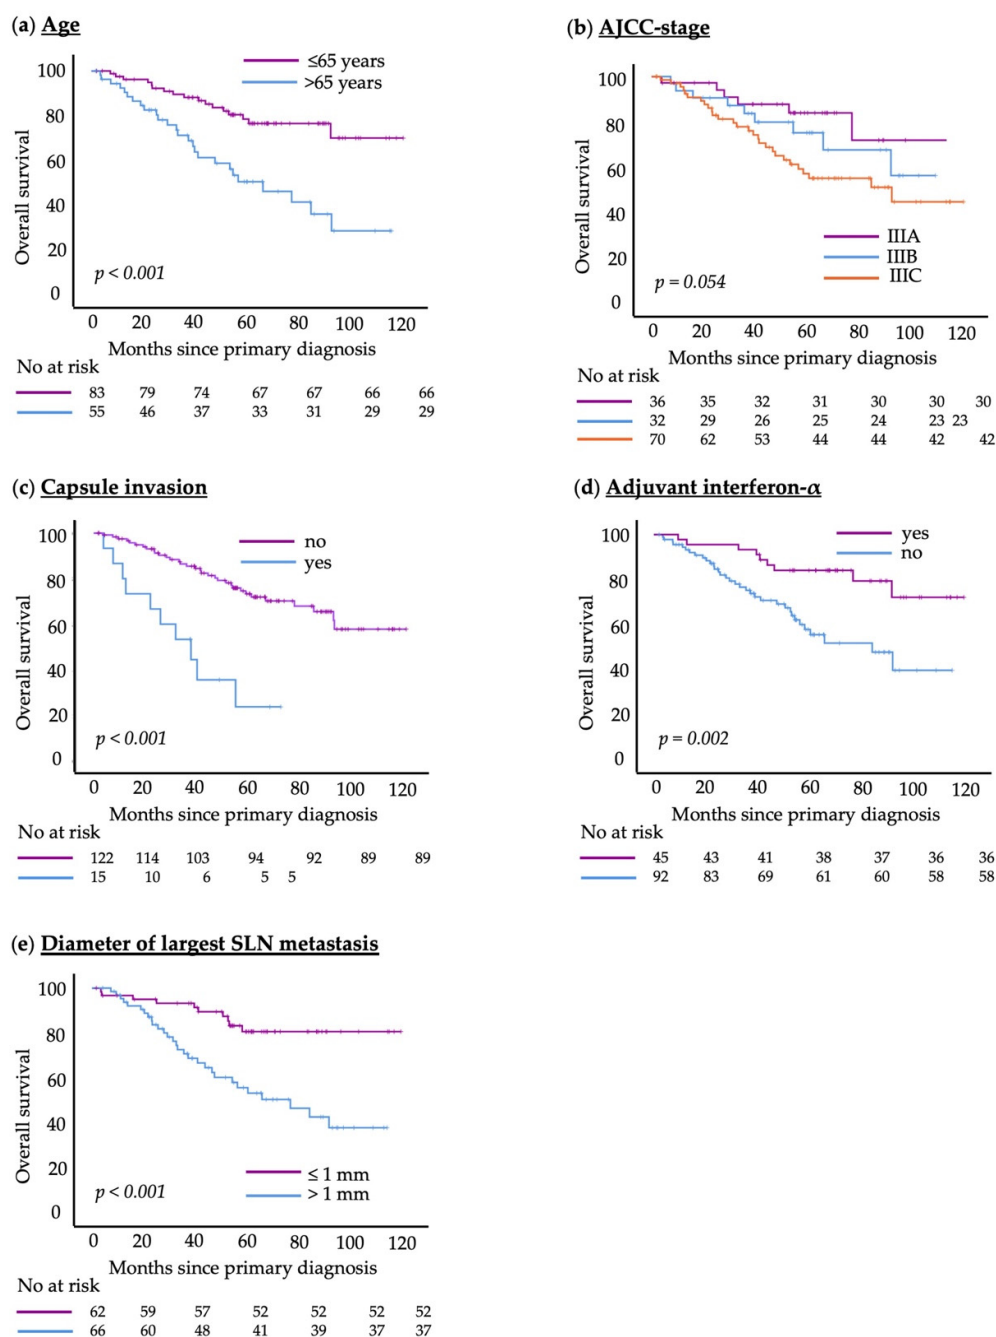

**Figure S1. Kaplan-Meier survival curves showing overall survival for covariates of the multivariate Cox regression model:** (a) patient age; (b) AJCC-stage; (c) capsule invasion of sentinel lymph node (SLN) metastasis; (d) adjuvant interferon- $\alpha$  therapy; (e) diameter of largest SLN metastasis. The log-rank test was used to compare between groups;  $p < 0.05$  was considered significant.
